# Supplementary material for: Outcome reporting bias in trials: a methodological approach for assessment and adjustment in systematic reviews
Source: PubMed Central journal article supplement (PMC6161807; doi:10.1136/bmj.k3802), 2018-09-28
Supplement: kirj043794.ww.pdf [file kirj043794.ww.pdf]

**Supplementary Table 1: ORB classification tables with justification**

*Ben-Menachem 1996*

| <b>Review outcome</b>                                                     | <b>Classification</b> | <b>Justification for classification</b>                                                                                                                                                                                                                                                                                                                                                                                                          |
|---------------------------------------------------------------------------|-----------------------|--------------------------------------------------------------------------------------------------------------------------------------------------------------------------------------------------------------------------------------------------------------------------------------------------------------------------------------------------------------------------------------------------------------------------------------------------|
| 50% reduction in seizure frequency                                        | NA                    | Outcome data reported in review meta-analysis.                                                                                                                                                                                                                                                                                                                                                                                                   |
| Seizure freedom                                                           | E                     | 50% reduction in seizure frequency was reported in this trial and therefore the trial must have measured seizure freedom. As the five studies reporting on seizure freedom reported non-significant results, it is likely that seizure freedom was analysed in this trial but not reported because of a non-significant result, especially as the 50% reduction in seizure frequency result was reported to be significant favouring topiramate. |
| Treatment withdrawal                                                      | NA                    | Outcome data reported in review meta-analysis.                                                                                                                                                                                                                                                                                                                                                                                                   |
| <i>Harms data were collected during patient interviews at each visit.</i> |                       |                                                                                                                                                                                                                                                                                                                                                                                                                                                  |
| Dizziness                                                                 | NA                    | Outcome data reported in review meta-analysis.                                                                                                                                                                                                                                                                                                                                                                                                   |
| Headache                                                                  | NA                    | Outcome data reported in review meta-analysis.                                                                                                                                                                                                                                                                                                                                                                                                   |
| Nausea/vomiting                                                           | R1                    | The AEs reported in the trials were only those that occurred in $\geq 15\%$ in either treatment group. Clear outcome was measured but not reported as unlikely to have met the reporting threshold.                                                                                                                                                                                                                                              |
| Paraesthesias                                                             | NA                    | Outcome data reported in review meta-analysis.                                                                                                                                                                                                                                                                                                                                                                                                   |
| Weight loss/decrease                                                      | NA                    | Outcome data reported in review meta-analysis.                                                                                                                                                                                                                                                                                                                                                                                                   |
| Fatigue                                                                   | NA                    | Outcome data reported in review meta-analysis.                                                                                                                                                                                                                                                                                                                                                                                                   |
| Somnolence                                                                | R1                    | The AEs reported in the trials were only those that occurred in $\geq 15\%$ in either treatment group. Clear outcome was measured but not reported as unlikely to have met the reporting threshold.                                                                                                                                                                                                                                              |
| Concentration impairment                                                  | NA                    | Outcome data reported in review meta-analysis.                                                                                                                                                                                                                                                                                                                                                                                                   |
| Speech difficulty                                                         | R1                    | The AEs reported in the trials were only those that occurred in $\geq 15\%$ in either treatment group. Clear outcome was measured but not reported as unlikely to have met the reporting threshold.                                                                                                                                                                                                                                              |
| Thinking abnormally                                                       | R1                    | The AEs reported in the trials were only those that occurred in $\geq 15\%$ in either treatment group. Clear outcome was measured but not reported as unlikely to have met the reporting threshold.                                                                                                                                                                                                                                              |
| Ataxia                                                                    | R1                    | The AEs reported in the trials were only those that occurred in $\geq 15\%$ in either treatment group. Clear outcome was measured but not reported as unlikely to have met the reporting threshold.                                                                                                                                                                                                                                              |

Etherman 1999

| Review outcome                                                                                             | Classification | Justification for classification                                                                                                                                                                    |
|------------------------------------------------------------------------------------------------------------|----------------|-----------------------------------------------------------------------------------------------------------------------------------------------------------------------------------------------------|
| 50% reduction in seizure frequency                                                                         | NA             | Outcome data reported in review meta-analysis.                                                                                                                                                      |
| Seizure freedom                                                                                            | NA             | Outcome data reported in review meta-analysis.                                                                                                                                                      |
| Treatment withdrawal                                                                                       | NA             | Outcome data reported in review meta-analysis.                                                                                                                                                      |
| <i>Harms data were collected by interviewing patients (or parents/guardians) in a non-directed manner.</i> |                |                                                                                                                                                                                                     |
| Dizziness                                                                                                  | R1             | The AEs reported in the trials were only those that occurred in $\geq 10\%$ in either treatment group. Clear outcome was measured but not reported as unlikely to have met the reporting threshold. |
| Headache                                                                                                   | R1             | The AEs reported in the trials were only those that occurred in $\geq 10\%$ in either treatment group. Clear outcome was measured but not reported as unlikely to have met the reporting threshold. |
| Nausea/vomiting                                                                                            | R1             | The AEs reported in the trials were only those that occurred in $\geq 10\%$ in either treatment group. Clear outcome was measured but not reported as unlikely to have met the reporting threshold. |
| Paraesthesias                                                                                              | R1             | The AEs reported in the trials were only those that occurred in $\geq 10\%$ in either treatment group. Clear outcome was measured but not reported as unlikely to have met the reporting threshold. |
| Weight loss/decrease                                                                                       | NA             | Outcome data reported in review meta-analysis.                                                                                                                                                      |
| Fatigue                                                                                                    | NA             | Outcome data reported in review meta-analysis.                                                                                                                                                      |
| Somnolence                                                                                                 | NA             | Outcome data reported in review meta-analysis.                                                                                                                                                      |
| Concentration impairment                                                                                   | NA             | Outcome data reported in review meta-analysis.                                                                                                                                                      |
| Speech difficulty                                                                                          | R1             | The AEs reported in the trials were only those that occurred in $\geq 10\%$ in either treatment group. Clear outcome was measured but not reported as unlikely to have met the reporting threshold. |
| Thinking abnormally                                                                                        | R1             | The AEs reported in the trials were only those that occurred in $\geq 10\%$ in either treatment group. Clear outcome was measured but not reported as unlikely to have met the reporting threshold. |
| Ataxia                                                                                                     | R1             | The AEs reported in the trials were only those that occurred in $\geq 10\%$ in either treatment group. Clear outcome was measured but not reported as unlikely to have met the reporting threshold. |

| Review outcome                                                       | Classification | Justification for classification                                                                                                                                                                                                                                                                                                                                                                                                                 |
|----------------------------------------------------------------------|----------------|--------------------------------------------------------------------------------------------------------------------------------------------------------------------------------------------------------------------------------------------------------------------------------------------------------------------------------------------------------------------------------------------------------------------------------------------------|
| 50% reduction in seizure frequency                                   | NA             | Outcome data reported in review meta-analysis.                                                                                                                                                                                                                                                                                                                                                                                                   |
| Seizure freedom                                                      | E              | 50% reduction in seizure frequency was reported in this trial and therefore the trial must have measured seizure freedom. As the five studies reporting on seizure freedom reported non-significant results, it is likely that seizure freedom was analysed in this trial but not reported because of a non-significant result, especially as the 50% reduction in seizure frequency result was reported to be significant favouring topiramate. |
| Treatment withdrawal                                                 | NA             | Outcome data reported in review meta-analysis.                                                                                                                                                                                                                                                                                                                                                                                                   |
| <i>Harms data were recorded in the subject's diary and reviewed.</i> |                |                                                                                                                                                                                                                                                                                                                                                                                                                                                  |
| Dizziness                                                            | NA             | Outcome data reported in review meta-analysis.                                                                                                                                                                                                                                                                                                                                                                                                   |
| Headache                                                             | NA             | Outcome data reported in review meta-analysis.                                                                                                                                                                                                                                                                                                                                                                                                   |
| Nausea/vomiting                                                      | R1             | The AEs reported in the trials were only those that occurred in $\geq 20\%$ in either treatment group. Clear outcome was measured but not reported as unlikely to have met the reporting threshold.                                                                                                                                                                                                                                              |
| Paraesthesias                                                        | NA             | Outcome data reported in review meta-analysis.                                                                                                                                                                                                                                                                                                                                                                                                   |
| Weight loss/decrease                                                 | R1             | The AEs reported in the trials were only those that occurred in $\geq 20\%$ in either treatment group. Clear outcome was measured but not reported as unlikely to have met the reporting threshold.                                                                                                                                                                                                                                              |
| Fatigue                                                              | NA             | Outcome data reported in review meta-analysis.                                                                                                                                                                                                                                                                                                                                                                                                   |
| Somnolence                                                           | NA             | Outcome data reported in review meta-analysis.                                                                                                                                                                                                                                                                                                                                                                                                   |
| Concentration impairment                                             | R1             | The AEs reported in the trials were only those that occurred in $\geq 20\%$ in either treatment group. Clear outcome was measured but not reported as unlikely to have met the reporting threshold.                                                                                                                                                                                                                                              |
| Speech difficulty                                                    | R1             | The AEs reported in the trials were only those that occurred in $\geq 20\%$ in either treatment group. Clear outcome was measured but not reported as unlikely to have met the reporting threshold.                                                                                                                                                                                                                                              |
| Thinking abnormally                                                  | NA             | Outcome data reported in review meta-analysis.                                                                                                                                                                                                                                                                                                                                                                                                   |
| Ataxia                                                               | NA             | Outcome data reported in review meta-analysis.                                                                                                                                                                                                                                                                                                                                                                                                   |

| <b>Review outcome</b>                                 | <b>Classification</b> | <b>Justification for classification</b>                                                                                                                                                            |
|-------------------------------------------------------|-----------------------|----------------------------------------------------------------------------------------------------------------------------------------------------------------------------------------------------|
| 50% reduction in seizure frequency                    | NA                    | Outcome data reported in review meta-analysis.                                                                                                                                                     |
| Seizure freedom                                       | NA                    | Outcome data reported in review meta-analysis.                                                                                                                                                     |
| Treatment withdrawal                                  | NA                    | Outcome data reported in review meta-analysis.                                                                                                                                                     |
| <i>Harms data collection method was not recorded.</i> |                       |                                                                                                                                                                                                    |
| Dizziness                                             | NA                    | Outcome data reported in review meta-analysis.                                                                                                                                                     |
| Headache                                              | R1                    | The AEs reported in the trials were only those that occurred in $\geq 5\%$ in either treatment group. Clear outcome was measured but not reported as unlikely to have met the reporting threshold. |
| Nausea/vomiting                                       | R1                    | The AEs reported in the trials were only those that occurred in $\geq 5\%$ in either treatment group. Clear outcome was measured but not reported as unlikely to have met the reporting threshold. |
| Paraesthesias                                         | NA                    | Outcome data reported in review meta-analysis.                                                                                                                                                     |
| Weight loss/decrease                                  | NA                    | Outcome data reported in review meta-analysis.                                                                                                                                                     |
| Fatigue                                               | NA                    | Outcome data reported in review meta-analysis.                                                                                                                                                     |
| Somnolence                                            | NA                    | Outcome data reported in review meta-analysis.                                                                                                                                                     |
| Concentration impairment                              | NA                    | Outcome data reported in review meta-analysis.                                                                                                                                                     |
| Speech difficulty                                     | R1                    | The AEs reported in the trials were only those that occurred in $\geq 5\%$ in either treatment group. Clear outcome was measured but not reported as unlikely to have met the reporting threshold. |
| Thinking abnormally                                   | R1                    | The AEs reported in the trials were only those that occurred in $\geq 5\%$ in either treatment group. Clear outcome was measured but not reported as unlikely to have met the reporting threshold. |
| Ataxia                                                | R1                    | The AEs reported in the trials were only those that occurred in $\geq 5\%$ in either treatment group. Clear outcome was measured but not reported as unlikely to have met the reporting threshold. |

Korean 1999

| Review outcome                                                          | Classification | Justification for classification                                                                                                                                                                   |
|-------------------------------------------------------------------------|----------------|----------------------------------------------------------------------------------------------------------------------------------------------------------------------------------------------------|
| 50% reduction in seizure frequency                                      | NA             | Outcome data reported in review meta-analysis.                                                                                                                                                     |
| Seizure freedom                                                         | NA             | Outcome data reported in review meta-analysis.                                                                                                                                                     |
| Treatment withdrawal                                                    | NA             | Outcome data reported in review meta-analysis.                                                                                                                                                     |
| <i>Harms data were assessed by physicians from the patient diaries.</i> |                |                                                                                                                                                                                                    |
| Dizziness                                                               | NA             | Outcome data reported in review meta-analysis.                                                                                                                                                     |
| Headache                                                                | NA             | Outcome data reported in review meta-analysis.                                                                                                                                                     |
| Nausea/vomiting                                                         | NA             | Outcome data reported in review meta-analysis.                                                                                                                                                     |
| Paraesthesias                                                           | R1             | The AEs reported in the trials were only those that occurred in $\geq 5\%$ in either treatment group. Clear outcome was measured but not reported as unlikely to have met the reporting threshold. |
| Weight loss/decrease                                                    | NA             | Outcome data reported in review meta-analysis.                                                                                                                                                     |
| Fatigue                                                                 | R1             | The AEs reported in the trials were only those that occurred in $\geq 5\%$ in either treatment group. Clear outcome was measured but not reported as unlikely to have met the reporting threshold. |
| Somnolence                                                              | NA             | Outcome data reported in review meta-analysis.                                                                                                                                                     |
| Concentration impairment                                                | R1             | The AEs reported in the trials were only those that occurred in $\geq 5\%$ in either treatment group. Clear outcome was measured but not reported as unlikely to have met the reporting threshold. |
| Speech difficulty                                                       | NA             | Outcome data reported in review meta-analysis.                                                                                                                                                     |
| Thinking abnormally                                                     | R1             | The AEs reported in the trials were only those that occurred in $\geq 5\%$ in either treatment group. Clear outcome was measured but not reported as unlikely to have met the reporting threshold. |
| Ataxia                                                                  | NA             | Outcome data reported in review meta-analysis.                                                                                                                                                     |

Privitera 1996

| Review outcome                                                        | Classification | Justification for classification                                                                                                                                                                                                                                                                                                                                                             |
|-----------------------------------------------------------------------|----------------|----------------------------------------------------------------------------------------------------------------------------------------------------------------------------------------------------------------------------------------------------------------------------------------------------------------------------------------------------------------------------------------------|
| 50% reduction in seizure frequency                                    | NA             | Outcome data reported in review meta-analysis.                                                                                                                                                                                                                                                                                                                                               |
| Seizure freedom                                                       | E              | <i>“A 75 to 100% reduction in seizure was not experienced by any patient in the placebo group but was observed in 23% of patients who received topiramate 600mg/day and 13% of patients treated with topiramate 800mg/day or 1000mg/day”</i> . Clearly no seizure free events on placebo but the possibility of some events on treatment. Outcome clearly measured but not reported in full. |
| Treatment withdrawal                                                  | NA             | Outcome data reported in review meta-analysis.                                                                                                                                                                                                                                                                                                                                               |
| <i>Harms data were collected and evaluated at each patient visit.</i> |                |                                                                                                                                                                                                                                                                                                                                                                                              |
| Dizziness                                                             | NA             | Outcome data reported in review meta-analysis.                                                                                                                                                                                                                                                                                                                                               |
| Headache                                                              | NA             | Outcome data reported in review meta-analysis.                                                                                                                                                                                                                                                                                                                                               |
| Nausea/vomiting                                                       | R1             | The AEs reported in the trials were only those that occurred in $\geq 20\%$ in either treatment group. Clear outcome was measured but not reported as unlikely to have met the reporting threshold.                                                                                                                                                                                          |
| Paraesthesias                                                         | NA             | Outcome data reported in review meta-analysis.                                                                                                                                                                                                                                                                                                                                               |
| Weight loss/decrease                                                  | Q              | <i>“Weight loss was present in some patients with anorexia; however, weight was not measured at each visit, and a quantitative assessment of weight change was not available”</i> . Clear outcome measurement not taken routinely for all patients                                                                                                                                           |
| Fatigue                                                               | NA             | Outcome data reported in review meta-analysis.                                                                                                                                                                                                                                                                                                                                               |
| Somnolence                                                            | NA             | Outcome data reported in review meta-analysis.                                                                                                                                                                                                                                                                                                                                               |
| Concentration impairment                                              | NA             | Outcome data reported in review meta-analysis.                                                                                                                                                                                                                                                                                                                                               |
| Speech difficulty                                                     | R1             | The AEs reported in the trials were only those that occurred in $\geq 20\%$ in either treatment group. Clear outcome was measured but not reported as unlikely to have met the reporting threshold.                                                                                                                                                                                          |
| Thinking abnormally                                                   | NA             | Outcome data reported in review meta-analysis.                                                                                                                                                                                                                                                                                                                                               |
| Ataxia                                                                | NA             | Outcome data reported in review meta-analysis.                                                                                                                                                                                                                                                                                                                                               |

*Rosenfeld 1996 (this was an abstract only)*

| <b>Review outcome</b>                                                   | <b>Classification</b> | <b>Justification for classification</b>                                                                                                                                                                                                                                                                                                     |
|-------------------------------------------------------------------------|-----------------------|---------------------------------------------------------------------------------------------------------------------------------------------------------------------------------------------------------------------------------------------------------------------------------------------------------------------------------------------|
| 50% reduction in seizure frequency                                      | NA                    | Outcome data reported in review meta-analysis.                                                                                                                                                                                                                                                                                              |
| Seizure freedom                                                         | C                     | <p><i>"Twenty-five percent of topiramate patients (placebo 5%) had <math>\geq</math>75% reduction in total seizure frequency and 6% (placebo, none) became seizure free."</i></p> <p>Clear no patients became seizure free in placebo group; percentage data given for treatment group but no reliable numerator/denominator presented.</p> |
| Treatment withdrawal                                                    | NA                    | Outcome data reported in review meta-analysis.                                                                                                                                                                                                                                                                                              |
| <i>Harms data were assessed by physicians from the patient diaries.</i> |                       |                                                                                                                                                                                                                                                                                                                                             |
| Dizziness                                                               | NA                    | Outcome data reported in review meta-analysis.                                                                                                                                                                                                                                                                                              |
| Headache                                                                | R1                    | Most common harms were listed only (no threshold specified). Clear outcome was measured but not reported as likely to have been uncommon.                                                                                                                                                                                                   |
| Nausea/vomiting                                                         | NA                    | Outcome data reported in review meta-analysis.                                                                                                                                                                                                                                                                                              |
| Paraesthesias                                                           | R1                    | Most common harms were listed only (no threshold specified). Clear outcome was measured but not reported as likely to have been uncommon.                                                                                                                                                                                                   |
| Weight loss/decrease                                                    | R1                    | Most common harms were listed only (no threshold specified). Clear outcome was measured but not reported as likely to have been uncommon.                                                                                                                                                                                                   |
| Fatigue                                                                 | NA                    | Outcome data reported in review meta-analysis.                                                                                                                                                                                                                                                                                              |
| Somnolence                                                              | NA                    | Outcome data reported in review meta-analysis.                                                                                                                                                                                                                                                                                              |
| Concentration impairment                                                | R1                    | Most common harms were listed only (no threshold specified). Clear outcome was measured but not reported as likely to have been uncommon.                                                                                                                                                                                                   |
| Speech difficulty                                                       | R1                    | Most common harms were listed only (no threshold specified). Clear outcome was measured but not reported as likely to have been uncommon.                                                                                                                                                                                                   |
| Thinking abnormally                                                     | NA                    | Outcome data reported in review meta-analysis.                                                                                                                                                                                                                                                                                              |
| Ataxia                                                                  | NA                    | Outcome data reported in review meta-analysis.                                                                                                                                                                                                                                                                                              |

| Review outcome                                                                                          | Classification | Justification for classification                                                                                                                                                                    |
|---------------------------------------------------------------------------------------------------------|----------------|-----------------------------------------------------------------------------------------------------------------------------------------------------------------------------------------------------|
| 50% reduction in seizure frequency                                                                      | NA             | Outcome data reported in review meta-analysis.                                                                                                                                                      |
| Seizure freedom                                                                                         | NA             | Outcome data reported in review meta-analysis.                                                                                                                                                      |
| Treatment withdrawal                                                                                    | NA             | Outcome data reported in review meta-analysis.                                                                                                                                                      |
| <i>Harms data were collected by interviewing patients in a non-directed manner at each study visit.</i> |                |                                                                                                                                                                                                     |
| Dizziness                                                                                               | R1             | The AEs reported in the trials were only those that occurred in $\geq 10\%$ in either treatment group. Clear outcome was measured but not reported as unlikely to have met the reporting threshold. |
| Headache                                                                                                | NA             | Outcome data reported in review meta-analysis.                                                                                                                                                      |
| Nausea/vomiting                                                                                         | R1             | The AEs reported in the trials were only those that occurred in $\geq 10\%$ in either treatment group. Clear outcome was measured but not reported as unlikely to have met the reporting threshold. |
| Paraesthesias                                                                                           | R1             | The AEs reported in the trials were only those that occurred in $\geq 10\%$ in either treatment group. Clear outcome was measured but not reported as unlikely to have met the reporting threshold. |
| Weight loss/decrease                                                                                    | NA             | Outcome data reported in review meta-analysis.                                                                                                                                                      |
| Fatigue                                                                                                 | NA             | Outcome data reported in review meta-analysis.                                                                                                                                                      |
| Somnolence                                                                                              | NA             | Outcome data reported in review meta-analysis.                                                                                                                                                      |
| Concentration impairment                                                                                | NA             | Outcome data reported in review meta-analysis.                                                                                                                                                      |
| Speech difficulty                                                                                       | NA             | Outcome data reported in review meta-analysis.                                                                                                                                                      |
| Thinking abnormally                                                                                     | R1             | The AEs reported in the trials were only those that occurred in $\geq 10\%$ in either treatment group. Clear outcome was measured but not reported as unlikely to have met the reporting threshold. |
| Ataxia                                                                                                  | R1             | The AEs reported in the trials were only those that occurred in $\geq 10\%$ in either treatment group. Clear outcome was measured but not reported as unlikely to have met the reporting threshold. |



Tassinari 1996

| Review outcome                                                                 | Classification | Justification for classification                                                                                                                                                                    |
|--------------------------------------------------------------------------------|----------------|-----------------------------------------------------------------------------------------------------------------------------------------------------------------------------------------------------|
| 50% reduction in seizure frequency                                             | NA             | Outcome data reported in review meta-analysis.                                                                                                                                                      |
| Seizure freedom                                                                | NA             | Outcome data reported in review meta-analysis.                                                                                                                                                      |
| Treatment withdrawal                                                           | NA             | Outcome data reported in review meta-analysis.                                                                                                                                                      |
| <i>Harms data collected by interviewing patients in a non-directed manner.</i> |                |                                                                                                                                                                                                     |
| Dizziness                                                                      | NA             | Outcome data reported in review meta-analysis.                                                                                                                                                      |
| Headache                                                                       | NA             | Outcome data reported in review meta-analysis.                                                                                                                                                      |
| Nausea/vomiting                                                                | NA             | Outcome data reported in review meta-analysis.                                                                                                                                                      |
| Paraesthesias                                                                  | R1             | The AEs reported in the trials were only those that occurred in $\geq 10\%$ in either treatment group. Clear outcome was measured but not reported as unlikely to have met the reporting threshold. |
| Weight loss/decrease                                                           | NA             | Outcome data reported in review meta-analysis.                                                                                                                                                      |
| Fatigue                                                                        | NA             | Outcome data reported in review meta-analysis.                                                                                                                                                      |
| Somnolence                                                                     | NA             | Outcome data reported in review meta-analysis.                                                                                                                                                      |
| Concentration impairment                                                       | NA             | Outcome data reported in review meta-analysis.                                                                                                                                                      |
| Speech difficulty                                                              | R1             | The AEs reported in the trials were only those that occurred in $\geq 10\%$ in either treatment group. Clear outcome was measured but not reported as unlikely to have met the reporting threshold. |
| Thinking abnormally                                                            | NA             | Outcome data reported in review meta-analysis.                                                                                                                                                      |
| Ataxia                                                                         | R1             | The AEs reported in the trials were only those that occurred in $\geq 10\%$ in either treatment group. Clear outcome was measured but not reported as unlikely to have met the reporting threshold. |

| Review outcome                                                                                                            | Classification | Justification for classification                                                                                                                                                                                                                                                                                                                                                                                                                 |
|---------------------------------------------------------------------------------------------------------------------------|----------------|--------------------------------------------------------------------------------------------------------------------------------------------------------------------------------------------------------------------------------------------------------------------------------------------------------------------------------------------------------------------------------------------------------------------------------------------------|
| 50% reduction in seizure frequency                                                                                        | NA             | Outcome data reported in review meta-analysis.                                                                                                                                                                                                                                                                                                                                                                                                   |
| Seizure freedom                                                                                                           | E              | 50% reduction in seizure frequency was reported in this trial and therefore the trial must have measured seizure freedom. As the five studies reporting on seizure freedom reported non-significant results, it is likely that seizure freedom was analysed in this trial but not reported because of a non-significant result, especially as the 50% reduction in seizure frequency result was reported to be significant favouring topiramate. |
| Treatment withdrawal                                                                                                      | NA             | Outcome data reported in review meta-analysis.                                                                                                                                                                                                                                                                                                                                                                                                   |
| <i>Harms data were inscribed into a diary or reported to the physician by phone. No questionnaires for AEs were used.</i> |                |                                                                                                                                                                                                                                                                                                                                                                                                                                                  |
| Dizziness                                                                                                                 | S1             | Dizziness was combined with somnolence in the reporting. Clearly measured for both treatment arms.                                                                                                                                                                                                                                                                                                                                               |
| Headache                                                                                                                  | NA             | Outcome data reported in review meta-analysis.                                                                                                                                                                                                                                                                                                                                                                                                   |
| Nausea/vomiting                                                                                                           | NA             | Outcome data reported in review meta-analysis.                                                                                                                                                                                                                                                                                                                                                                                                   |
| Paraesthesias                                                                                                             | NA             | Outcome data reported in review meta-analysis.                                                                                                                                                                                                                                                                                                                                                                                                   |
| Weight loss/decrease                                                                                                      | NA             | Outcome data reported in review meta-analysis.                                                                                                                                                                                                                                                                                                                                                                                                   |
| Fatigue                                                                                                                   | T1             | All harms appear to be reported with no reporting restrictions. Likely no events.                                                                                                                                                                                                                                                                                                                                                                |
| Somnolence                                                                                                                | S1             | Dizziness was combined with somnolence in the reporting. Clearly measured for both treatment arms.                                                                                                                                                                                                                                                                                                                                               |
| Concentration impairment                                                                                                  | T1             | All harms appear to be reported with no reporting restrictions . Likely no events.                                                                                                                                                                                                                                                                                                                                                               |
| Speech difficulty                                                                                                         | T1             | All harms appear to be reported with no reporting restrictions . Likely no events.                                                                                                                                                                                                                                                                                                                                                               |
| Thinking abnormally                                                                                                       | T1             | All harms appear to be reported with no reporting restrictions . Likely no events.                                                                                                                                                                                                                                                                                                                                                               |
| Ataxia                                                                                                                    | T1             | All harms appear to be reported with no reporting restrictions . Likely no events.                                                                                                                                                                                                                                                                                                                                                               |

Zhang 2011

| <b>Review outcome</b>                                                                                                                   | <b>Classification</b> | <b>Justification for classification</b>                                                                          |
|-----------------------------------------------------------------------------------------------------------------------------------------|-----------------------|------------------------------------------------------------------------------------------------------------------|
| 50% reduction in seizure frequency                                                                                                      | NA                    | Outcome data reported in review meta-analysis.                                                                   |
| Seizure freedom                                                                                                                         | NA                    | Not reported in review meta-analysis but noted that there were no seizure free events in either treatment group. |
| Treatment withdrawal                                                                                                                    | NA                    | Outcome data reported in review meta-analysis.                                                                   |
| <i>Harm was assessed by the attending physician at the end of each 2-week interval. Data collection came from patient-held diaries.</i> |                       |                                                                                                                  |
| Dizziness                                                                                                                               | S1                    | Dizziness was combined with somnolence in the reporting. Clearly measured for both treatment arms.               |
| Headache                                                                                                                                | NA                    | Outcome data reported in review meta-analysis.                                                                   |
| Nausea/vomiting                                                                                                                         | T1                    | All harms appear to be reported with no reporting restrictions. Likely no events.                                |
| Paraesthesias                                                                                                                           | NA                    | Outcome data reported in review meta-analysis.                                                                   |
| Weight loss/decrease                                                                                                                    | NA                    | Outcome data reported in review meta-analysis.                                                                   |
| Fatigue                                                                                                                                 | NA                    | Outcome data reported in review meta-analysis.                                                                   |
| Somnolence                                                                                                                              | T1                    | All harms appear to be reported with no reporting restrictions . Likely no events.                               |
| Concentration impairment                                                                                                                | T1                    | All harms appear to be reported with no reporting restrictions . Likely no events.                               |
| Speech difficulty                                                                                                                       | NA                    | Outcome data reported in review meta-analysis.                                                                   |
| Thinking abnormally                                                                                                                     | T1                    | All harms appear to be reported with no reporting restrictions . Likely no events.                               |
| Ataxia                                                                                                                                  | T1                    | All harms appear to be reported with no reporting restrictions . Likely no events.                               |

*Coles 1999 (this was an abstract only)*

| <b>Review outcome</b>              | <b>Classification</b> | <b>Justification for classification</b>                                                                                                                                                                                                                            |
|------------------------------------|-----------------------|--------------------------------------------------------------------------------------------------------------------------------------------------------------------------------------------------------------------------------------------------------------------|
| 50% reduction in seizure frequency | E                     | “Seizure severity was measured using the Liverpool Scale (LS) and National Hospital Seizure Severity Scale (NHS3). Seizure frequency was recorded throughout by diary”.<br><br>Clear outcome measured. Likely analysed from data collected in diary.               |
| Seizure freedom                    | E                     | From above - clear outcome measured and likely analysed from data collected in diary.                                                                                                                                                                              |
| Treatment withdrawal               | G                     | This outcome was not mentioned in the abstract. However this is an important outcome in this context and was measured and reported in all other studies. Clinical judgement says likely measured.                                                                  |
| <i>No data reported on harms.</i>  |                       |                                                                                                                                                                                                                                                                    |
| Dizziness                          | S2                    | No data on harms presented, perhaps due to space limitations (this was reported as an abstract only). Judgment suggests that it is likely that any harm was measured. The decision was based on both clinical judgment and what was reported in all other studies. |
| Headache                           | S2                    | As for dizziness.                                                                                                                                                                                                                                                  |
| Nausea/vomiting                    | S2                    | As for dizziness.                                                                                                                                                                                                                                                  |
| Paraesthesias                      | S2                    | As for dizziness.                                                                                                                                                                                                                                                  |
| Weight loss/decrease               | S2                    | As for dizziness.                                                                                                                                                                                                                                                  |
| Fatigue                            | S2                    | As for dizziness.                                                                                                                                                                                                                                                  |
| Somnolence                         | S2                    | As for dizziness.                                                                                                                                                                                                                                                  |
| Concentration impairment           | S2                    | As for dizziness.                                                                                                                                                                                                                                                  |
| Speech difficulty                  | S2                    | As for dizziness.                                                                                                                                                                                                                                                  |
| Thinking abnormally                | S2                    | As for dizziness.                                                                                                                                                                                                                                                  |
| Ataxia                             | S2                    | As for dizziness.                                                                                                                                                                                                                                                  |
